# Supplementary material
Source: PubMed Central journal article supplement (PMC11503174)

**A**

|                 |                                 | <u>Cigarette use</u>     |                                 |                             |
|-----------------|---------------------------------|--------------------------|---------------------------------|-----------------------------|
|                 |                                 | <i>Never established</i> | <i>Established, non-current</i> | <i>Established, current</i> |
| <u>ENDS use</u> | <i>Never established</i>        | Never established use    | Non-current use                 | Cigarette-only use          |
|                 | <i>Established, non-current</i> | Non-current use          | Non-current use                 | Cigarette-only use          |
|                 | <i>Established, current</i>     | ENDS-only use            | ENDS-only user                  | Dual use                    |

**B**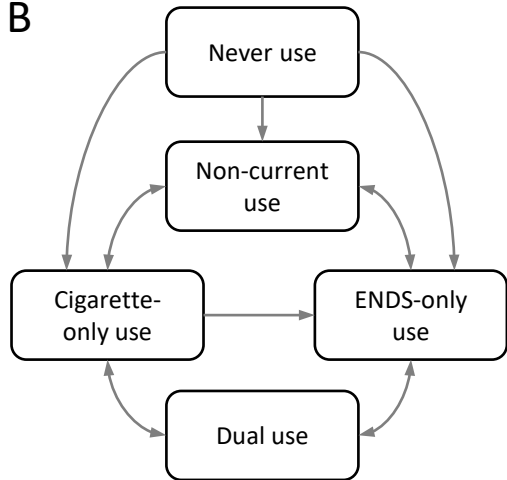

Supplement: tc-33-5-s001.pdf [file tc-33-5-s001.pdf]
