# Supplementary material
Source: PubMed Central journal article supplement (PMC11503174)
Supplement: tc-33-5-s003.pdf [file tc-33-5-s003.pdf]

### A. Ages 12–14 2015–2017 (Waves 2–4)

|      |                       | To                    |                     |                     |                      |                  |
|------|-----------------------|-----------------------|---------------------|---------------------|----------------------|------------------|
|      |                       | Never established use | Non-current use     | Cigarette-only use  | E-cigarette-only use | Dual use         |
| From | Never established use | 98.8<br>(98.6,99.0)   | 0.4<br>(0.3,0.5)    | 0.2<br>(0.1,0.3)    | 0.6<br>(0.5,0.8)     | 0.0<br>(0.0,0.1) |
|      | Non-current use       | 56.8<br>(42.3,71.2)   | 8.7<br>(1.4,16.1)   | 32.4<br>(18.5,46.4) | 2.1<br>(0.1,4.0)     |                  |
|      | Cigarette-only use    | 20.9<br>(3.0,38.8)    | 54.1<br>(27.6,80.7) | 8.9<br>(2.2,15.6)   | 16.0<br>(0.0,33.9)   |                  |
|      | E-cigarette-only use  | 46.0<br>(35.0,57.0)   | 4.8<br>(1.5,8.1)    | 47.0<br>(34.9,59.2) | 2.2<br>(0.0,5.9)     |                  |
|      | Dual use              | 13.2<br>(0.4,25.9)    | 35.2<br>(0.0,70.6)  | 12.6<br>(0.0,36.7)  | 39.0<br>(5.9,72.1)   |                  |

### B. Ages 12–14 2017–2019 (Waves 4–5)

|      |                       | To                    |                    |                     |                      |                  |
|------|-----------------------|-----------------------|--------------------|---------------------|----------------------|------------------|
|      |                       | Never established use | Non-current use    | Cigarette-only use  | E-cigarette-only use | Dual use         |
| From | Never established use | 98.0<br>(97.7,98.4)   | 0.4<br>(0.3,0.6)   | 0.1<br>(0.1,0.2)    | 1.3<br>(1.1,1.6)     | 0.1<br>(0.0,0.2) |
|      | Non-current use       | 65.7<br>(44.6,86.8)   | 12.5<br>(1.2,23.8) | 16.2<br>(0.9,31.6)  | 5.6<br>(0.0,12.0)    |                  |
|      | Cigarette-only use    | 2.6<br>(0.0,6.5)      | 45.0<br>(7.2,82.7) | 10.5<br>(0.0,25.6)  | 41.9<br>(10.8,73.1)  |                  |
|      | E-cigarette-only use  | 39.3<br>(29.2,49.5)   | 4.3<br>(0.0,8.6)   | 52.0<br>(41.1,62.9) | 4.4<br>(0.0,10.8)    |                  |
|      | Dual use              | 10.4<br>(0.0,22.7)    | 0.8<br>(0.0,2.3)   | 28.1<br>(0.0,57.7)  | 60.8<br>(18.0,103.6) |                  |

### C. Ages 15–17 2015–2017 (Waves 2–4)

|      |                       | To                    |                     |                     |                      |                  |
|------|-----------------------|-----------------------|---------------------|---------------------|----------------------|------------------|
|      |                       | Never established use | Non-current use     | Cigarette-only use  | E-cigarette-only use | Dual use         |
| From | Never established use | 91.8<br>(91.2,92.4)   | 4.3<br>(3.8,4.7)    | 1.0<br>(0.7,1.2)    | 2.6<br>(2.2,3.0)     | 0.4<br>(0.3,0.5) |
|      | Non-current use       | 62.4<br>(54.8,70.1)   | 15.1<br>(9.6,20.7)  | 18.2<br>(11.6,24.7) | 4.3<br>(2.6,5.9)     |                  |
|      | Cigarette-only use    | 21.0<br>(14.9,27.1)   | 59.8<br>(51.1,68.4) | 4.0<br>(2.3,5.8)    | 15.2<br>(8.3,22.1)   |                  |
|      | E-cigarette-only use  | 40.2<br>(32.5,47.9)   | 9.6<br>(7.0,12.1)   | 39.2<br>(32.1,46.2) | 11.1<br>(6.8,15.4)   |                  |
|      | Dual use              | 8.7<br>(5.3,12.0)     | 37.7<br>(27.0,48.4) | 4.3<br>(0.0,9.3)    | 49.4<br>(38.2,60.6)  |                  |

### D. Ages 15–17 2017–2019 (Waves 4–5)

|      |                       | To                    |                     |                     |                      |                  |
|------|-----------------------|-----------------------|---------------------|---------------------|----------------------|------------------|
|      |                       | Never established use | Non-current use     | Cigarette-only use  | E-cigarette-only use | Dual use         |
| From | Never established use | 92.4<br>(91.7,93.0)   | 1.2<br>(1.0,1.5)    | 0.6<br>(0.4,0.8)    | 5.4<br>(4.9,6.0)     | 0.4<br>(0.3,0.5) |
|      | Non-current use       | 54.5<br>(44.9,64.2)   | 8.6<br>(5.3,11.9)   | 33.3<br>(24.5,42.1) | 3.6<br>(2.4,4.7)     |                  |
|      | Cigarette-only use    | 10.8<br>(5.8,15.8)    | 61.1<br>(51.2,70.9) | 5.8<br>(3.1,8.5)    | 22.3<br>(13.9,30.7)  |                  |
|      | E-cigarette-only use  | 23.5<br>(18.5,28.5)   | 2.9<br>(1.7,4.0)    | 66.1<br>(60.9,71.4) | 7.5<br>(5.0,10.0)    |                  |
|      | Dual use              | 4.4<br>(2.1,6.8)      | 18.4<br>(5.4,31.4)  | 14.9<br>(5.8,24.0)  | 62.3<br>(44.1,80.4)  |                  |

### E. Ages 18–24 2015–2017 (Waves 2–4)

|      |                       | To                    |                     |                     |                      |                  |
|------|-----------------------|-----------------------|---------------------|---------------------|----------------------|------------------|
|      |                       | Never established use | Non-current use     | Cigarette-only use  | E-cigarette-only use | Dual use         |
| From | Never established use | 95.7<br>(95.2,96.1)   | 1.7<br>(1.4,2.0)    | 1.4<br>(1.2,1.7)    | 1.0<br>(0.8,1.3)     | 0.2<br>(0.1,0.2) |
|      | Non-current use       | 73.3<br>(70.1,76.5)   | 19.4<br>(16.5,22.3) | 5.7<br>(4.1,7.3)    | 1.7<br>(1.3,2.0)     |                  |
|      | Cigarette-only use    | 13.7<br>(12.2,15.1)   | 77.6<br>(75.5,79.6) | 1.9<br>(1.2,2.6)    | 6.9<br>(5.7,8.1)     |                  |
|      | E-cigarette-only use  | 32.9<br>(27.7,38.2)   | 10.6<br>(8.4,12.7)  | 45.3<br>(39.1,51.4) | 11.2<br>(8.2,14.3)   |                  |
|      | Dual use              | 9.0<br>(7.5,10.6)     | 43.5<br>(38.2,48.8) | 13.3<br>(10.0,16.5) | 34.2<br>(28.5,39.9)  |                  |

### F. Ages 18–24 2017–2019 (Waves 4–5)

|      |                       | To                    |                     |                     |                      |                  |
|------|-----------------------|-----------------------|---------------------|---------------------|----------------------|------------------|
|      |                       | Never established use | Non-current use     | Cigarette-only use  | E-cigarette-only use | Dual use         |
| From | Never established use | 96.4<br>(96.1,96.8)   | 1.1<br>(0.9,1.4)    | 0.6<br>(0.4,0.7)    | 1.8<br>(1.5,2.1)     | 0.1<br>(0.1,0.1) |
|      | Non-current use       | 78.9<br>(76.1,81.7)   | 8.3<br>(6.7,9.9)    | 11.8<br>(9.4,14.2)  | 1.1<br>(0.8,1.3)     |                  |
|      | Cigarette-only use    | 10.0<br>(8.2,11.9)    | 76.6<br>(74.1,79.0) | 3.2<br>(1.9,4.5)    | 10.2<br>(8.3,12.0)   |                  |
|      | E-cigarette-only use  | 19.3<br>(15.8,22.8)   | 1.7<br>(1.4,2.1)    | 73.0<br>(68.8,77.2) | 6.0<br>(3.7,8.2)     |                  |
|      | Dual use              | 3.8<br>(2.7,4.8)      | 15.2<br>(10.6,19.9) | 20.3<br>(15.0,25.7) | 60.6<br>(54.1,67.2)  |                  |

**G. Ages 25–34 2015–2017 (Waves 2–4)**

|      |                       | To                    |                      |                     |                      |                  |
|------|-----------------------|-----------------------|----------------------|---------------------|----------------------|------------------|
|      |                       | Never established use | Non-current use      | Cigarette-only use  | E-cigarette-only use | Dual use         |
| From | Never established use | 97.8<br>(95.5,100.1)  | 1.2<br>(0.0,4.3)     | 0.8<br>(0.1,1.5)    | 0.2<br>(0.0,0.8)     | 0.1<br>(0.0,0.2) |
|      | Non-current use       | 84.0<br>(51.2,116.8)  | 13.6<br>(0.0,40.6)   | 1.7<br>(0.0,6.0)    | 0.7<br>(0.0,2.2)     |                  |
|      | Cigarette-only use    | 11.6<br>(0.0,32.3)    | 82.0<br>(63.2,100.8) | 1.3<br>(0.0,2.7)    | 5.1<br>(0.0,12.2)    |                  |
|      | E-cigarette-only use  | 19.4<br>(0.0,44.0)    | 7.5<br>(0.8,14.2)    | 59.7<br>(29.1,90.2) | 13.5<br>(0.0,28.7)   |                  |
|      | Dual use              | 4.9<br>(0.0,10.1)     | 43.3<br>(35.3,51.3)  | 9.6<br>(6.5,12.7)   | 42.2<br>(35.9,48.5)  |                  |

**H. Ages 25–34 2017–2019 (Waves 4–5)**

|      |                       | To                    |                      |                      |                      |                  |
|------|-----------------------|-----------------------|----------------------|----------------------|----------------------|------------------|
|      |                       | Never established use | Non-current use      | Cigarette-only use   | E-cigarette-only use | Dual use         |
| From | Never established use | 98.8<br>(97.6,100.1)  | 0.5<br>(0.1,0.8)     | 0.5<br>(0.0,1.0)     | 0.2<br>(0.0,0.8)     | 0.0<br>(0.0,0.1) |
|      | Non-current use       | 90.4<br>(69.8,110.9)  | 7.4<br>(0.0,22.3)    | 1.9<br>(0.0,6.8)     | 0.3<br>(0.0,1.2)     |                  |
|      | Cigarette-only use    | 7.8<br>(0.0,31.4)     | 85.2<br>(64.4,106.1) | 1.7<br>(0.0,5.0)     | 5.2<br>(0.0,12.9)    |                  |
|      | E-cigarette-only use  | 13.7<br>(0.0,33.0)    | 2.0<br>(0.0,4.5)     | 75.6<br>(49.6,101.5) | 8.7<br>(0.0,20.0)    |                  |
|      | Dual use              | 2.2<br>(0.0,4.8)      | 23.0<br>(16.6,29.5)  | 11.8<br>(7.1,16.6)   | 63.0<br>(55.8,70.2)  |                  |

**I. Ages 35–54 2015–2017 (Waves 2–4)**

|      |                       | To                    |                     |                     |                      |                  |
|------|-----------------------|-----------------------|---------------------|---------------------|----------------------|------------------|
|      |                       | Never established use | Non-current use     | Cigarette-only use  | E-cigarette-only use | Dual use         |
| From | Never established use | 98.4<br>(98.0,98.7)   | 1.0<br>(0.7,1.3)    | 0.5<br>(0.4,0.7)    | 0.1<br>(0.0,0.1)     | 0.0<br>(0.0,0.0) |
|      | Non-current use       | 94.1<br>(93.1,95.2)   | 4.9<br>(3.9,5.8)    | 0.8<br>(0.4,1.1)    | 0.2<br>(0.1,0.3)     |                  |
|      | Cigarette-only use    | 7.3<br>(6.4,8.2)      | 88.7<br>(87.7,89.8) | 0.6<br>(0.3,0.9)    | 3.4<br>(2.8,3.9)     |                  |
|      | E-cigarette-only use  | 20.6<br>(15.3,26.0)   | 8.2<br>(6.0,10.4)   | 55.2<br>(48.1,62.4) | 15.9<br>(11.7,20.1)  |                  |
|      | Dual use              | 3.9<br>(3.0,4.7)      | 46.2<br>(40.8,51.5) | 9.8<br>(6.5,13.1)   | 40.1<br>(34.7,45.5)  |                  |

**J. Ages 35–54 2017–2019 (Waves 4–5)**

|      |                       | To                    |                     |                     |                      |                  |
|------|-----------------------|-----------------------|---------------------|---------------------|----------------------|------------------|
|      |                       | Never established use | Non-current use     | Cigarette-only use  | E-cigarette-only use | Dual use         |
| From | Never established use | 99.3<br>(99.1,99.5)   | 0.4<br>(0.2,0.6)    | 0.2<br>(0.1,0.3)    | 0.0<br>(0.0,0.1)     | 0.0<br>(0.0,0.0) |
|      | Non-current use       | 96.4<br>(95.6,97.1)   | 2.9<br>(2.3,3.5)    | 0.7<br>(0.4,0.9)    | 0.1<br>(0.1,0.1)     |                  |
|      | Cigarette-only use    | 6.0<br>(5.2,6.8)      | 89.9<br>(88.8,91.0) | 0.7<br>(0.4,1.0)    | 3.4<br>(2.7,4.1)     |                  |
|      | E-cigarette-only use  | 11.3<br>(7.2,15.3)    | 1.2<br>(0.6,1.8)    | 81.8<br>(76.9,86.7) | 5.7<br>(3.0,8.5)     |                  |
|      | Dual use              | 1.2<br>(0.8,1.5)      | 26.5<br>(20.8,32.2) | 3.7<br>(1.4,5.9)    | 68.7<br>(62.3,75.1)  |                  |

**K. Ages 55–90 2015–2017 (Waves 2–4)**

|      |                       | To                    |                     |                     |                      |                  |
|------|-----------------------|-----------------------|---------------------|---------------------|----------------------|------------------|
|      |                       | Never established use | Non-current use     | Cigarette-only use  | E-cigarette-only use | Dual use         |
| From | Never established use | 97.7<br>(97.1,98.3)   | 2.0<br>(1.4,2.5)    | 0.3<br>(0.2,0.4)    | 0.0<br>(0.0,0.1)     | 0.0<br>(0.0,0.0) |
|      | Non-current use       | 97.7<br>(97.2,98.2)   | 2.0<br>(1.5,2.5)    | 0.2<br>(0.1,0.4)    | 0.0<br>(0.0,0.0)     |                  |
|      | Cigarette-only use    | 8.3<br>(6.9,9.8)      | 89.6<br>(88.1,91.1) | 0.6<br>(0.3,0.9)    | 1.5<br>(1.0,2.0)     |                  |
|      | E-cigarette-only use  | 10.1<br>(5.2,14.9)    | 3.2<br>(1.5,5.0)    | 78.3<br>(70.9,85.7) | 8.4<br>(4.2,12.6)    |                  |
|      | Dual use              | 2.6<br>(2.0,3.3)      | 43.5<br>(36.6,50.5) | 6.3<br>(1.4,11.3)   | 47.5<br>(39.3,55.7)  |                  |

**L. Ages 55–90 2017–2019 (Waves 4–5)**

|      |                       | To                    |                     |                     |                      |                  |
|------|-----------------------|-----------------------|---------------------|---------------------|----------------------|------------------|
|      |                       | Never established use | Non-current use     | Cigarette-only use  | E-cigarette-only use | Dual use         |
| From | Never established use | 99.3<br>(99.0,99.5)   | 0.6<br>(0.3,0.8)    | 0.2<br>(0.1,0.3)    | 0.0<br>(0.0,0.0)     | 0.0<br>(0.0,0.0) |
|      | Non-current use       | 98.8<br>(98.4,99.1)   | 1.0<br>(0.7,1.3)    | 0.2<br>(0.0,0.5)    | 0.0<br>(0.0,0.0)     |                  |
|      | Cigarette-only use    | 6.7<br>(5.2,8.1)      | 91.6<br>(90.1,93.2) | 0.4<br>(0.2,0.7)    | 1.3<br>(0.7,1.8)     |                  |
|      | E-cigarette-only use  | 11.4<br>(6.0,16.8)    | 1.0<br>(0.2,1.9)    | 84.1<br>(77.8,90.5) | 3.4<br>(0.8,6.1)     |                  |
|      | Dual use              | 1.8<br>(1.2,2.5)      | 37.1<br>(27.5,46.6) | 5.6<br>(1.0,10.3)   | 55.5<br>(45.2,65.8)  |                  |
